# Supplementary material for: An interdependent network of functional enhancers regulates transcription and EZH2 loading at the INK4a/ARF locus
Source: PubMed Central journal article supplement — Cell Rep. Author manuscript; Available in PMC 2021 Jul 10. (PMC7611173; doi:10.1016/j.celrep.2021.108898), 2021-03-23
Supplement: EMS129423-supplement-Document_S1__Figures_S1_S7_and_Tables_S1_S3.pdf [file EMS129423-supplement-Document_S1__Figures_S1_S7_and_Tables_S1_S3.pdf]

**Cell Reports, Volume 34**

**Supplemental information**

**An interdependent network of functional  
enhancers regulates transcription  
and EZH2 loading at the INK4a/ARF locus**

**Umer Farooq, Bharath Saravanan, Zubairul Islam, Kaivalya Walavalkar, Anurag Kumar  
Singh, Ranveer Singh Jayani, Sweety Meel, Sudha Swaminathan, and Dimple Notani**

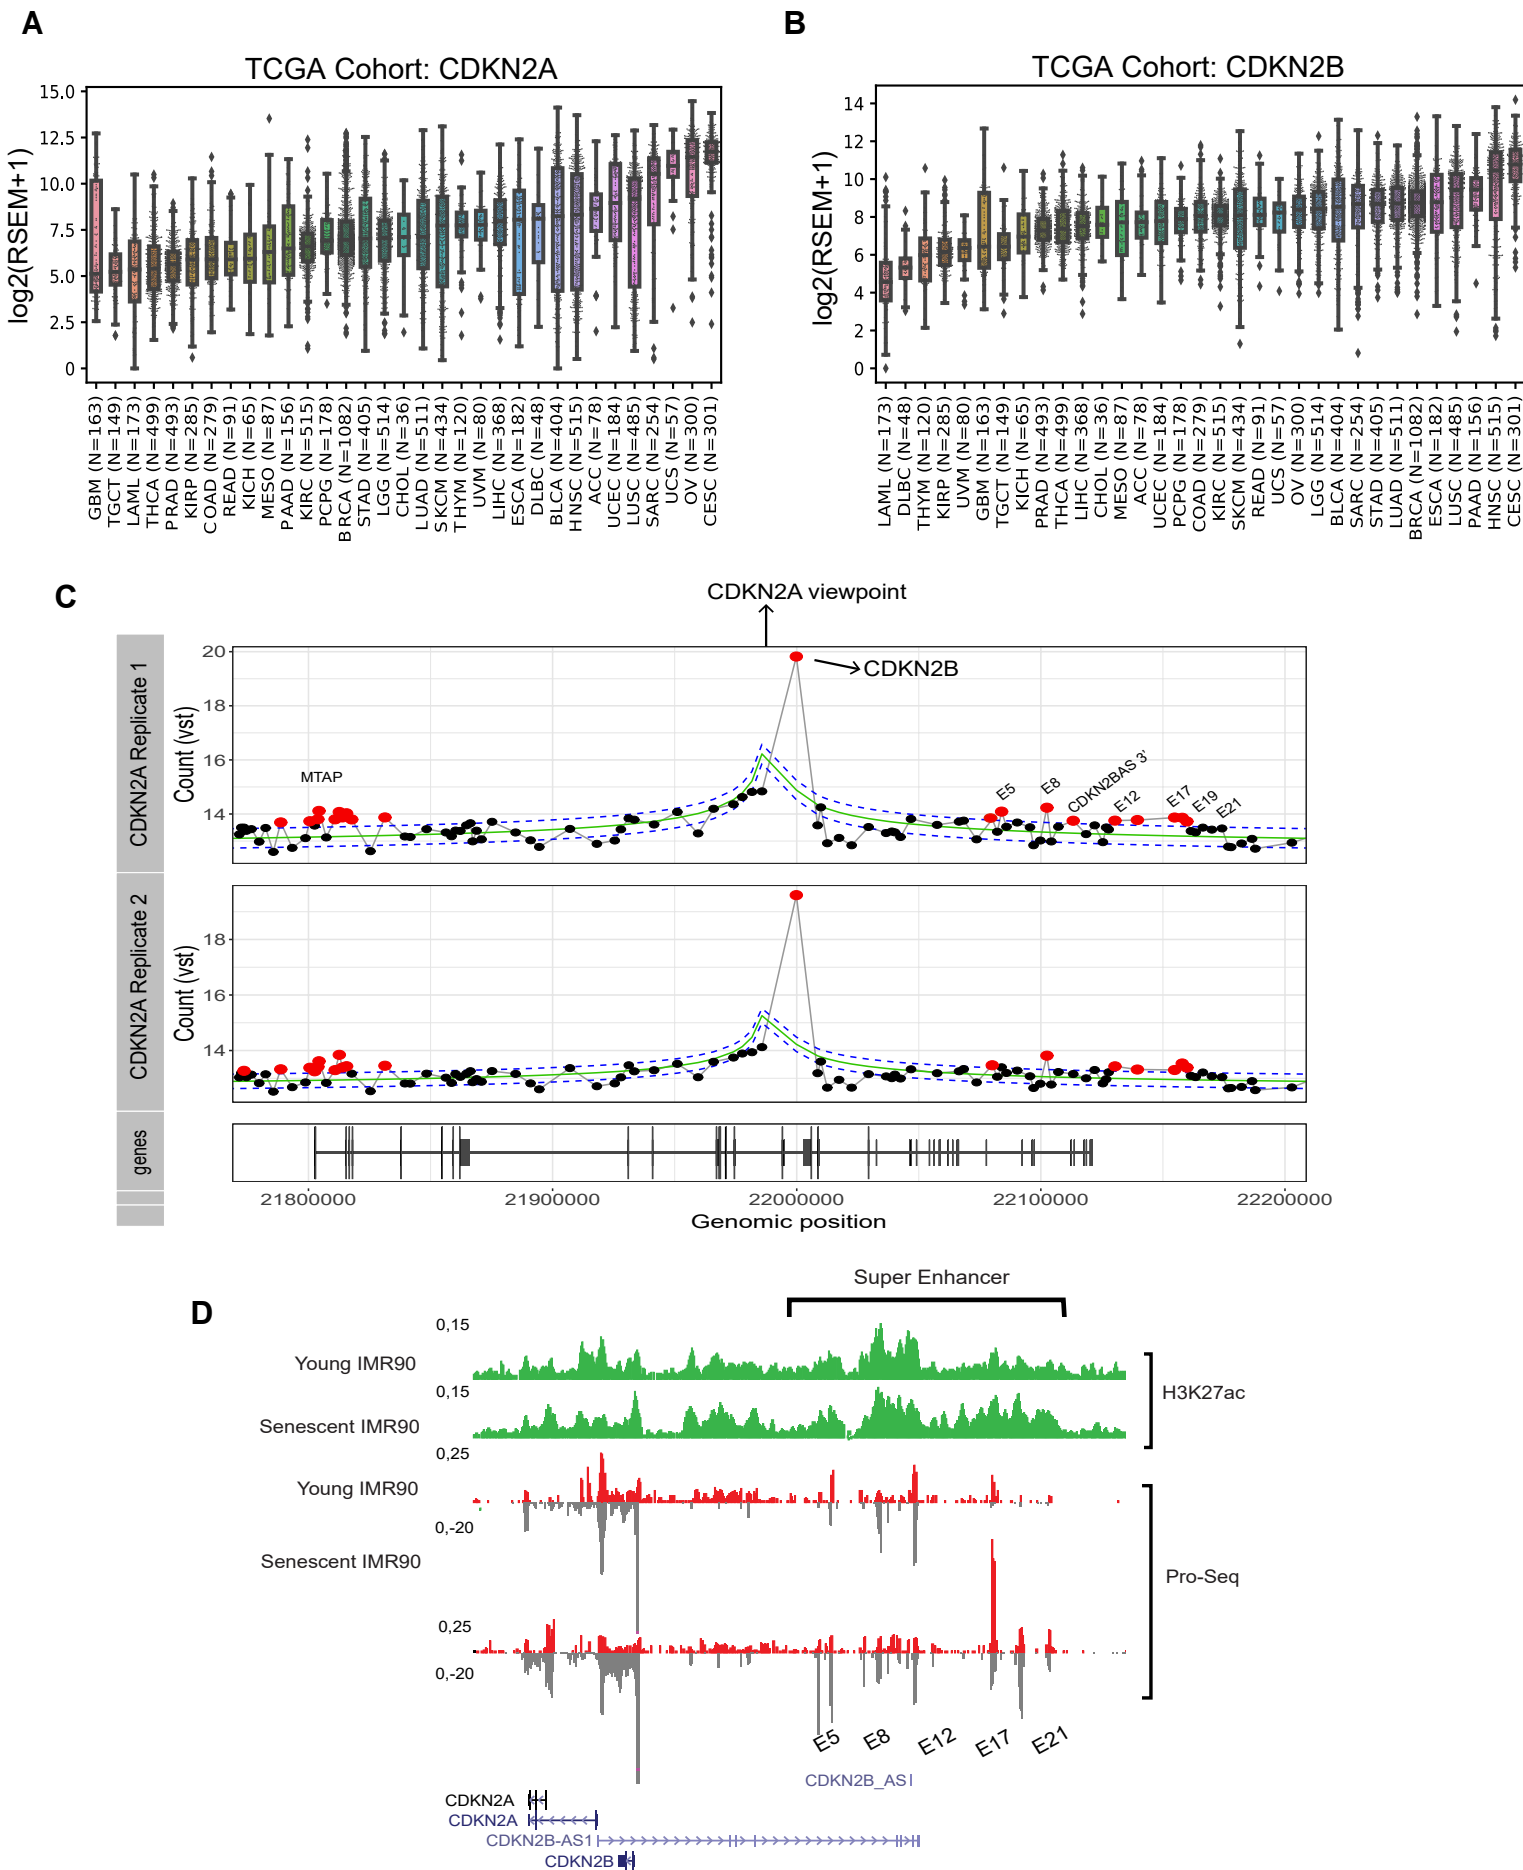

**Supplementary Figure 1 (Related to Figure 1 and Figure 2). CDKN2A/2B expression is high in cervical tumors:** (A) CDKN2A and (B) CDKN2B expression profiles in tumors of different origins. The expression of CDKN2A/2B is highest in tumors of cervical origin. (C) 4C plots showing the interactions from CDKN2A viewpoint, red dots represent the significant interactions. Several red dots are marked by their corresponding regulatory element. Both replicates have been individually plotted. (D) UCSC genome browser snapshots of H3K27ac, and PRO-seq in young and replicative senescent IMR90 fibroblasts. The enhancers are annotated below the track.



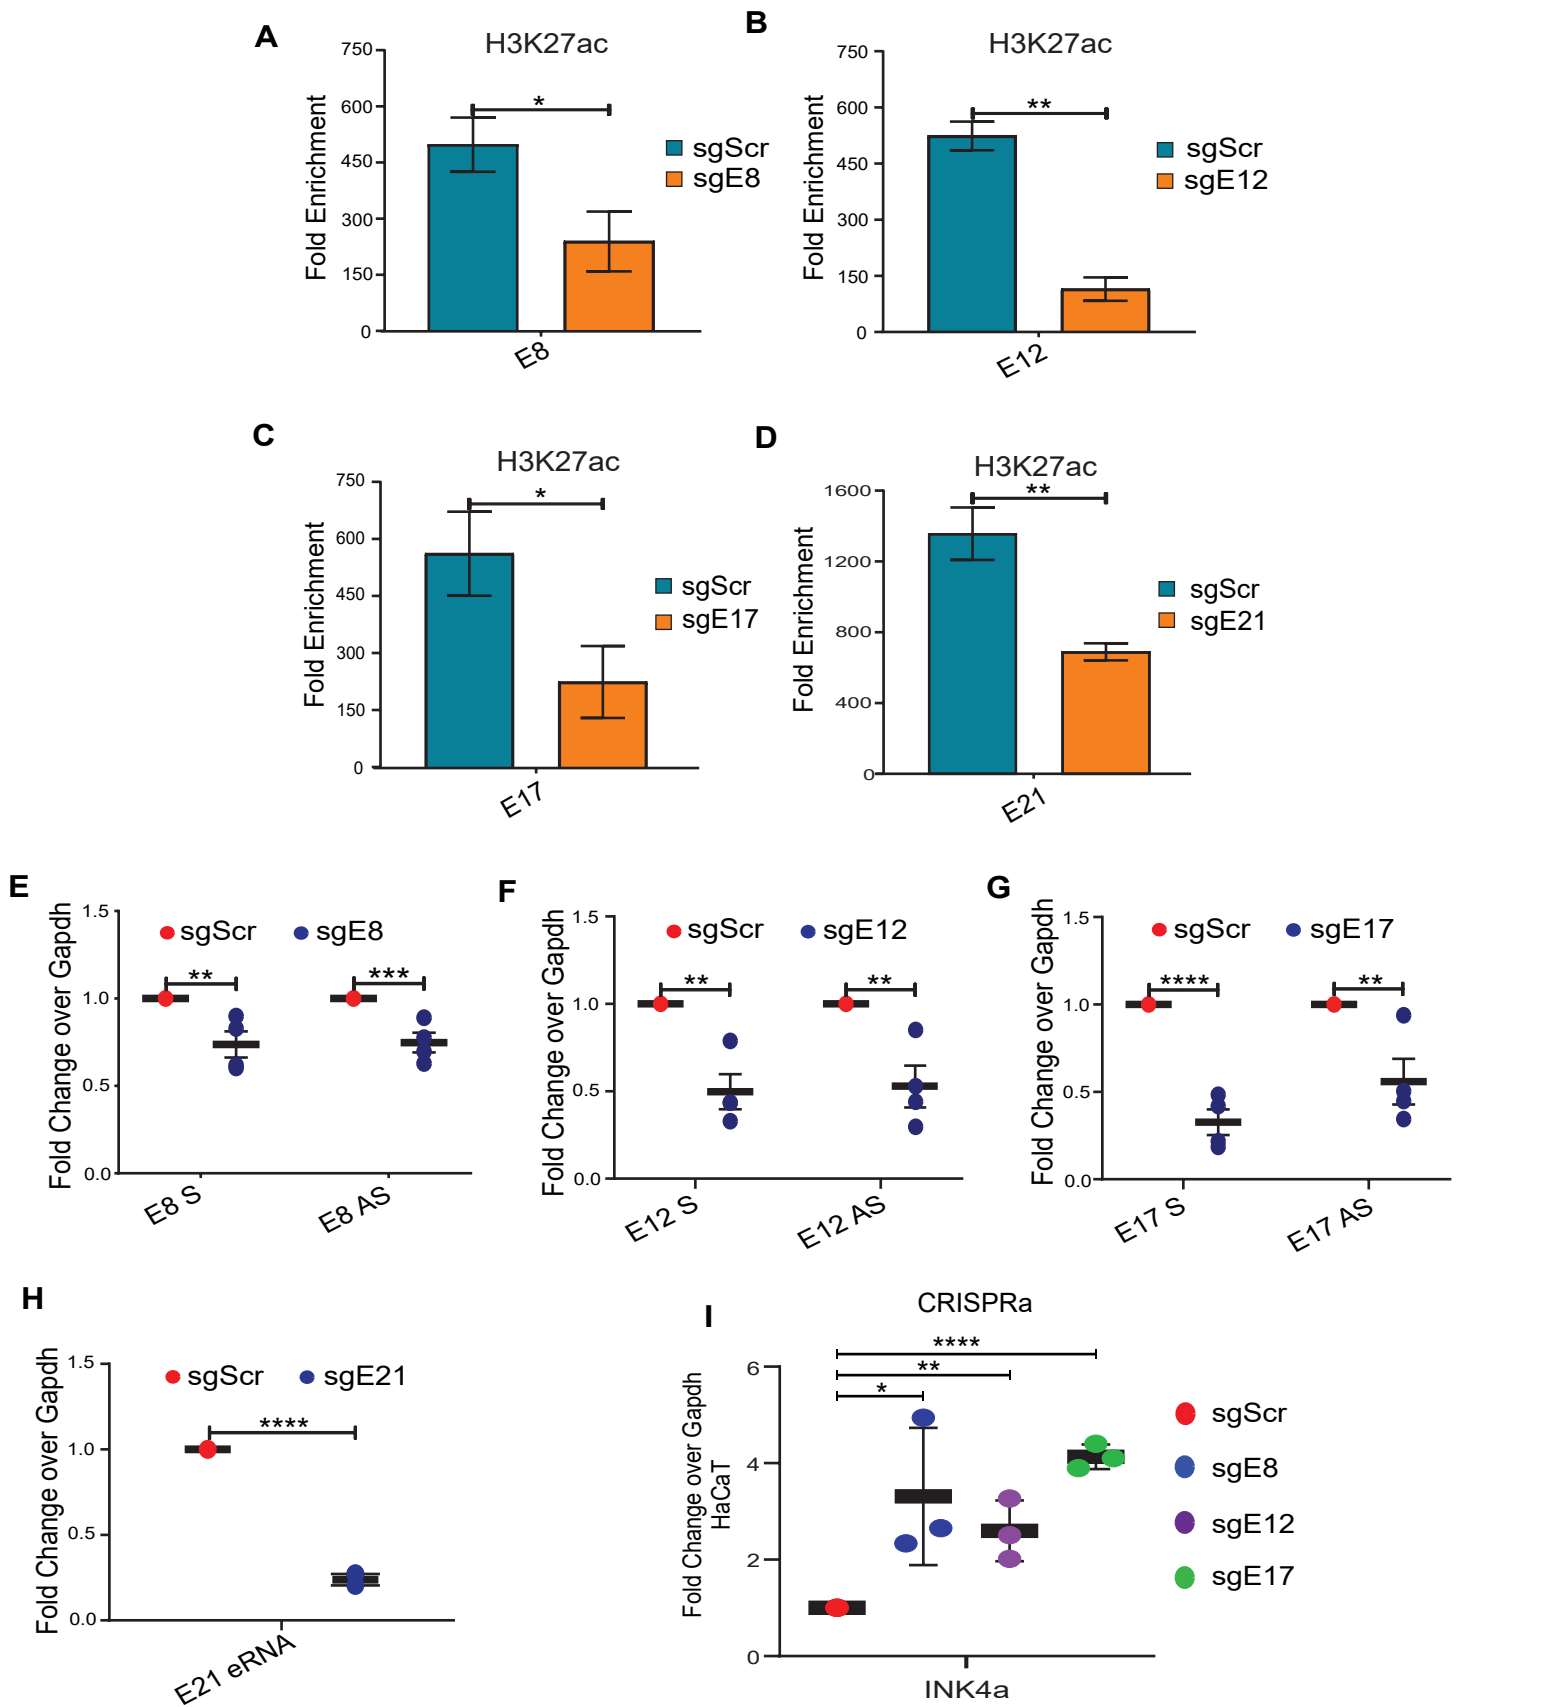

**Supplementary Figure 3 (Related to Figure 3). CRISPRi mediated silencing of enhancers is confirmed by the loss of H3K27ac and eRNA:** (A-D) H3K27ac enrichment goes down on the enhancers which are targeted for silencing (A) E8 enhancer, (B) E12 enhancer, (C) E17 enhancer and (D) E21 enhancer. (E-H) Enhancer silencing mediated via dCas9-KRAB system also shows loss of transcription of both sense and anti-sense eRNAs (E) E8 enhancer, (F) E12 enhancer (G) E17 enhancer and (H) E21 enhancer. (I) Enhancer activation mediated via dCas9-vpr system shows gain of transcription of INK4a gene in HaCaT cell line. Statistical significance is determined by unpaired t-test (\*p<0.05; \*\*p<0.01; \*\*\*p<0.005; \*\*\*\*p<0.001; ns p>0.05) and error bars denote SEM.



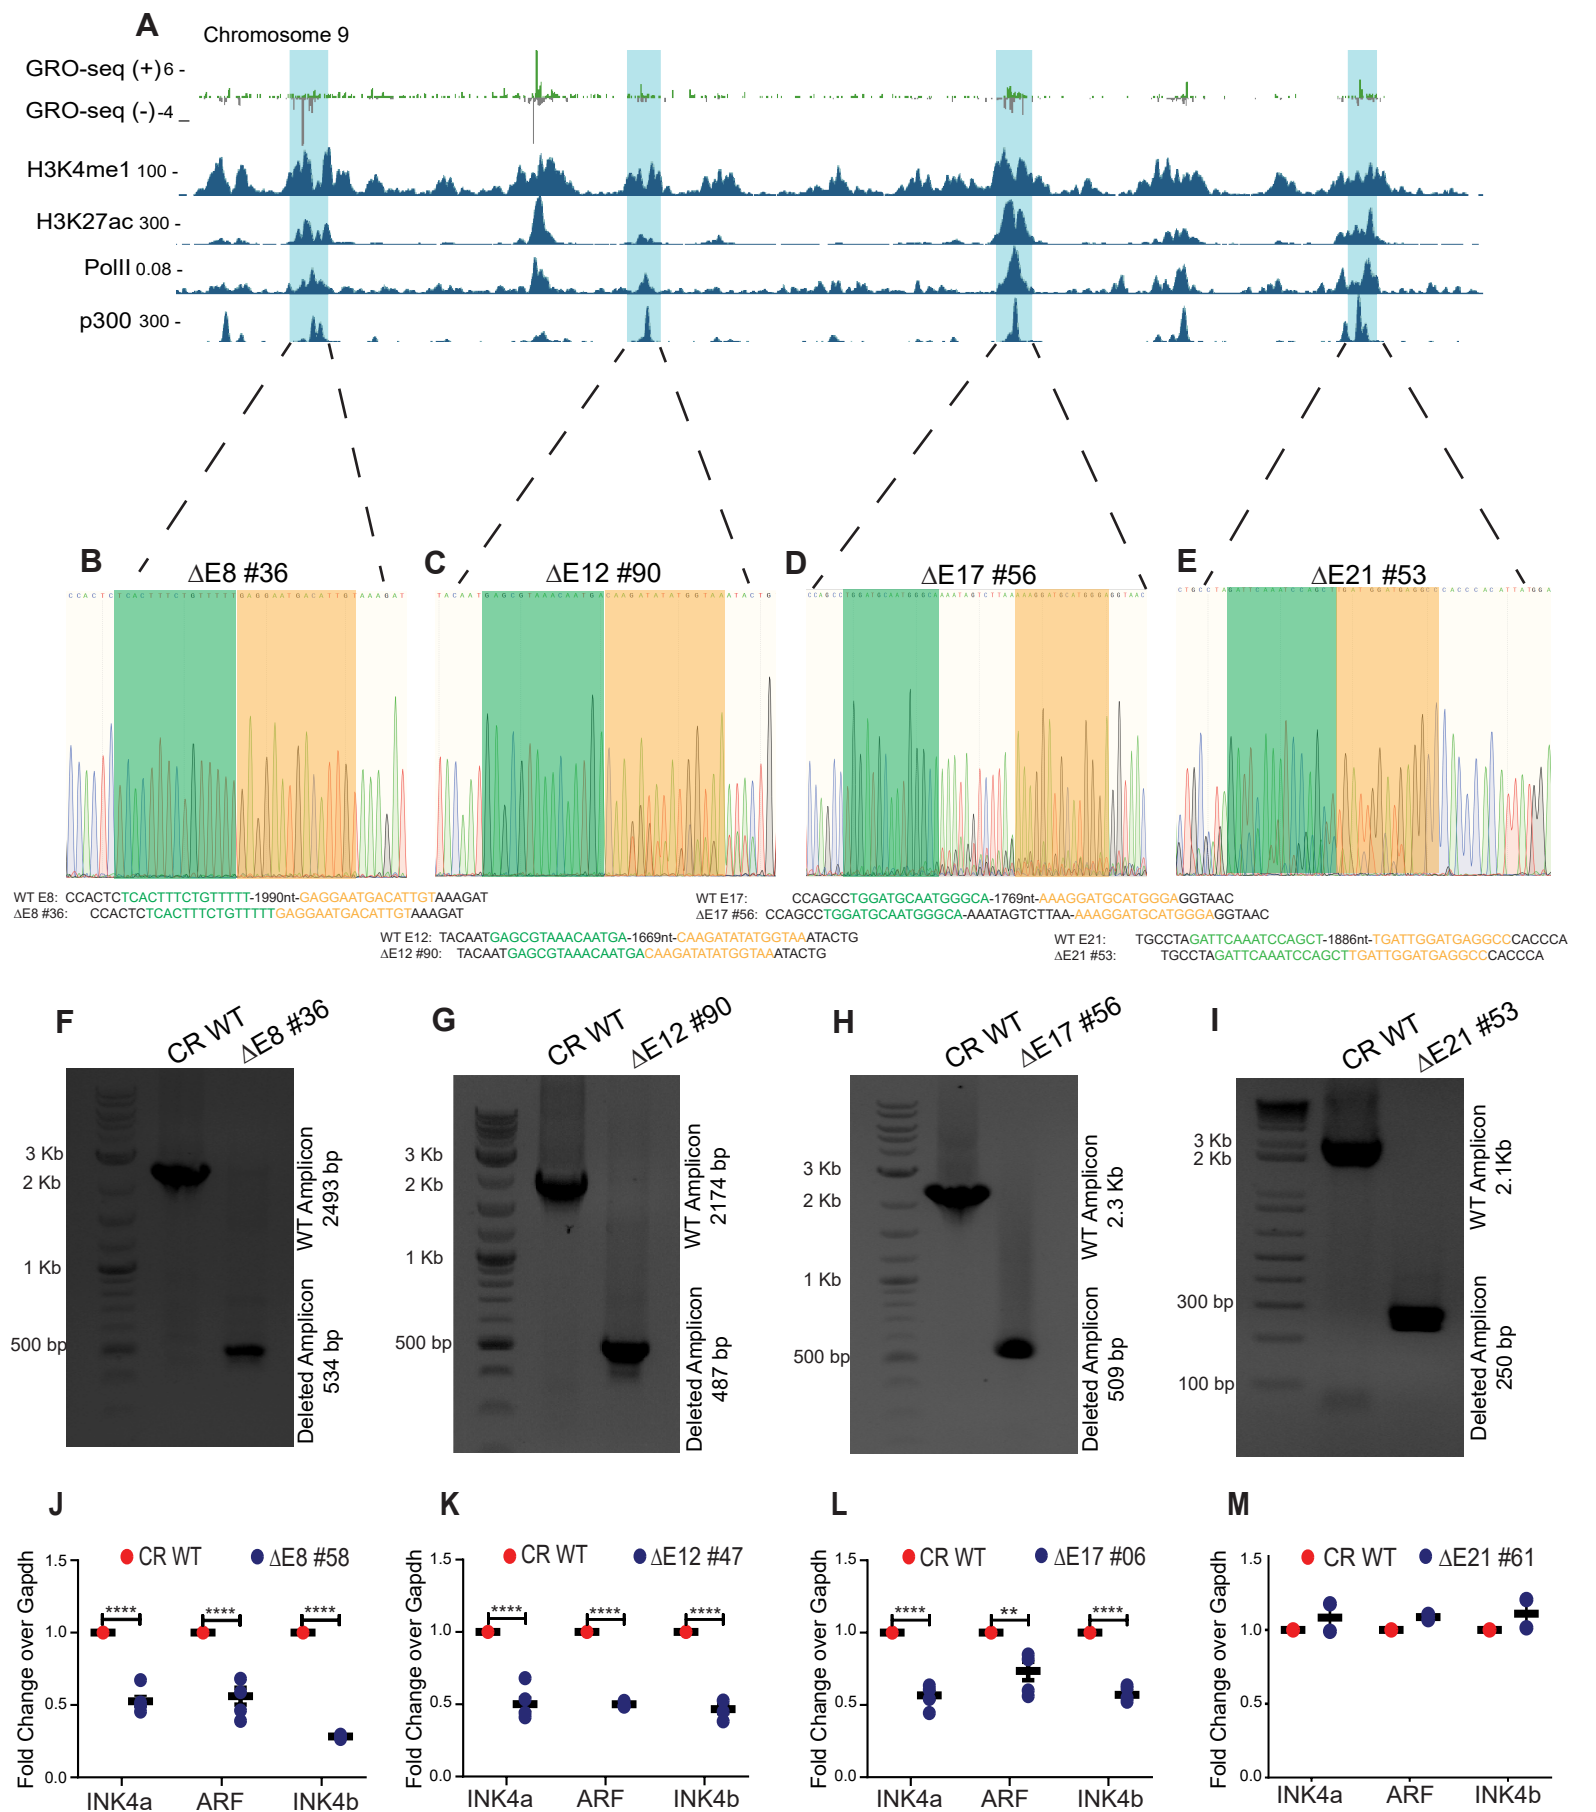

**Supplementary Figure 4 (Related to Figure 3). Confirmation of homozygous enhancer deletions and expression of INK4a/ARF genes in heterozygous deletion lines:** (A) ChIP-seq tracks showing H3K4me1, H3K27ac, PolII, p300 and GRO-seq signal at super enhancer region. The deleted enhancer regions are highlighted in light blue. (B), (C), (D) and (E) shows the sanger-seq chromatogram of E8, E12, E17 and E21 enhancer deletion junctions respectively. (F), (G), (H) and (I) Deletion of enhancers was confirmed by Surveyor assay. (J), (K), (L) and (M) Plots show expression levels of INK4a, ARF and INK4b genes in heterozygous set of deletion clones. Statistical significance is determined by unpaired t-test (\* $p < 0.05$ ; \*\* $p < 0.01$ ; \*\*\* $p < 0.005$ ; \*\*\*\* $p < 0.001$ ; ns  $p > 0.05$ ) and error bars denote SEM.

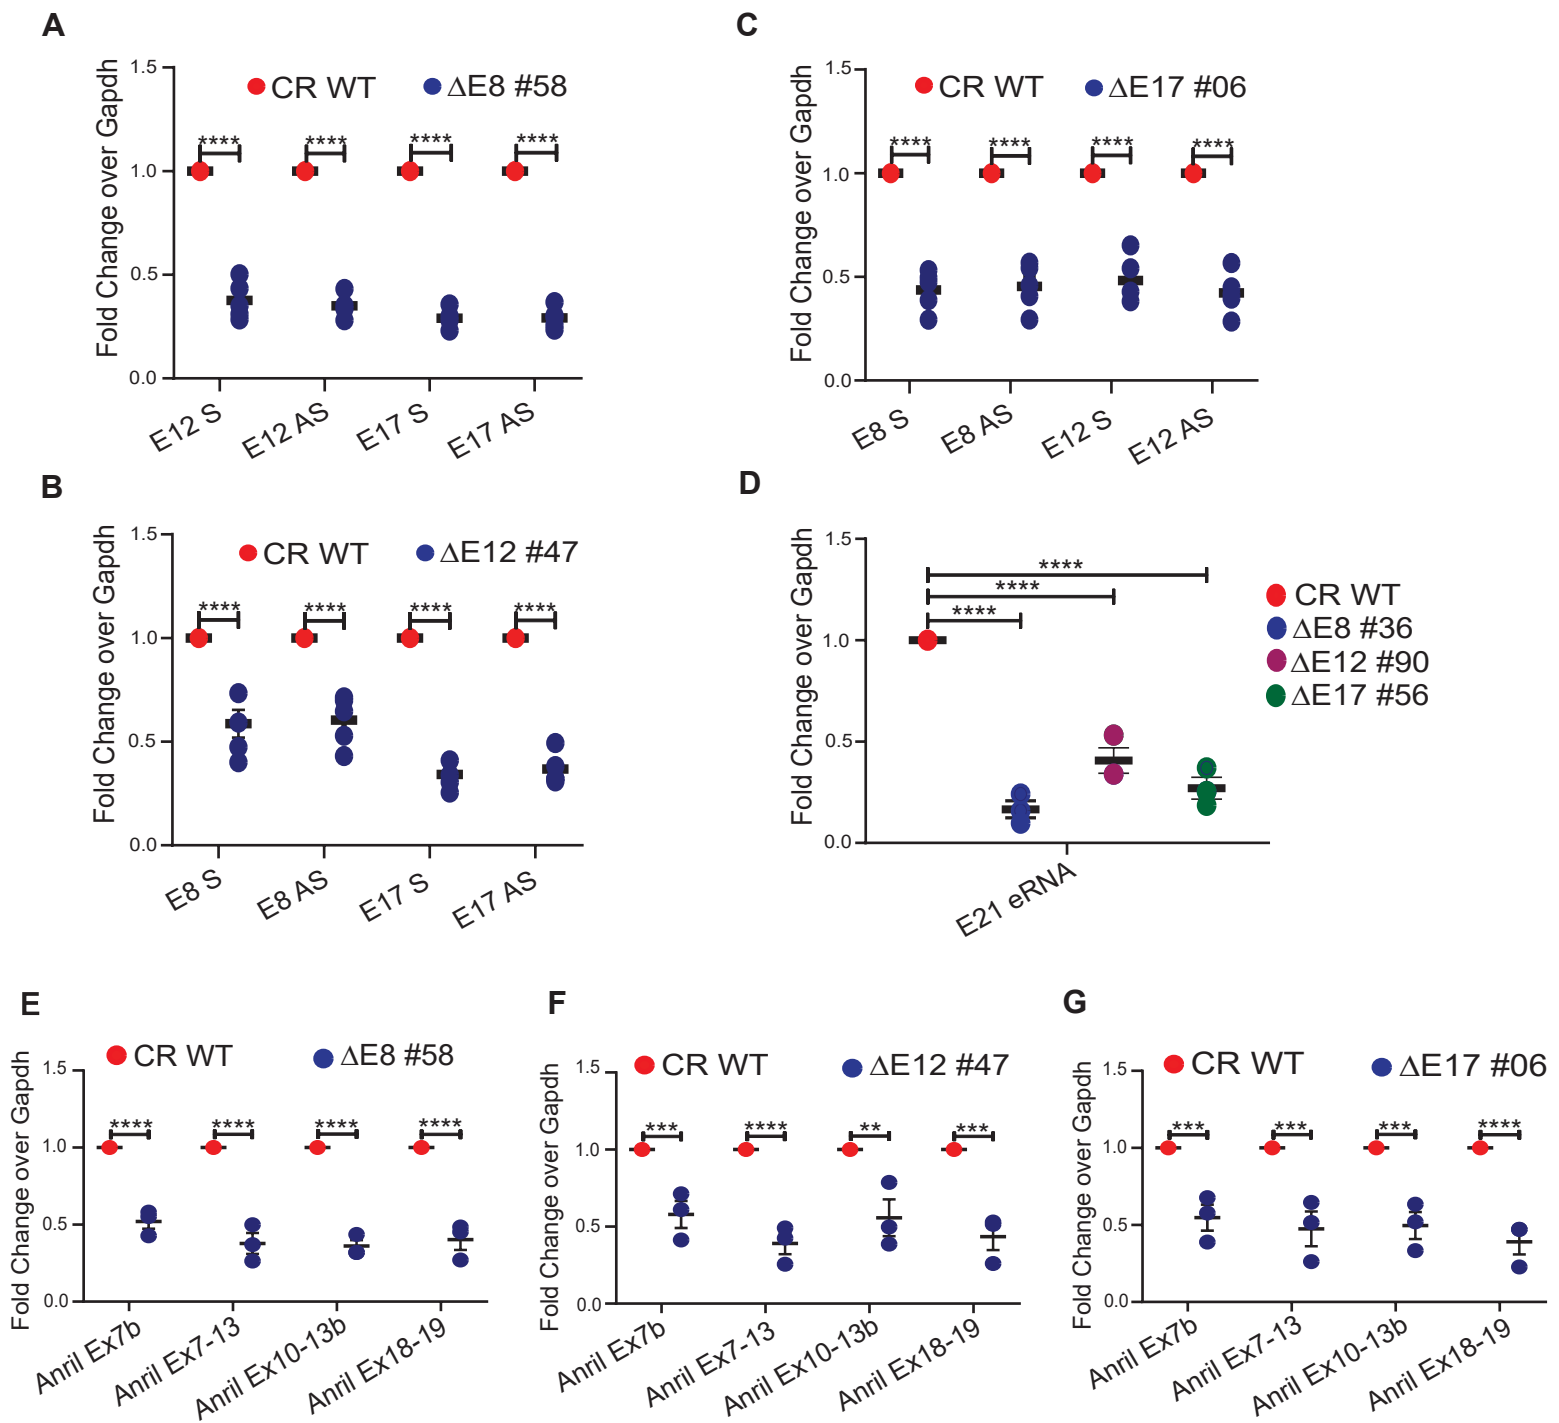

**Supplementary Figure 5 (Related to Figure 4 and Figure 5). Promoter interacting enhancers are inter-dependent on each other for their transcriptional activity:** (A) E12 and E17 eRNA expression in cells lines carrying heterozygous deletion of E8. (B) E8 and E17 eRNA expression in cell lines carrying heterozygous deletion of E12. (C) E8 and E12 eRNA expression carrying heterozygous deletion of E17. (D) E21 eRNA expression in cell lines carrying homozygous deletion of promoter interacting enhancers. (E-G) Expression of different ANRIL isoforms in cells carrying heterozygous deletions of (E) E8, (F) E12 and (G) E17. Statistical significance is determined by unpaired t-test (\* $p < 0.05$ ; \*\* $p < 0.01$ ; \*\*\* $p < 0.005$ ; \*\*\*\* $p < 0.001$ ; ns  $p > 0.05$ ) and error bars denote SEM.

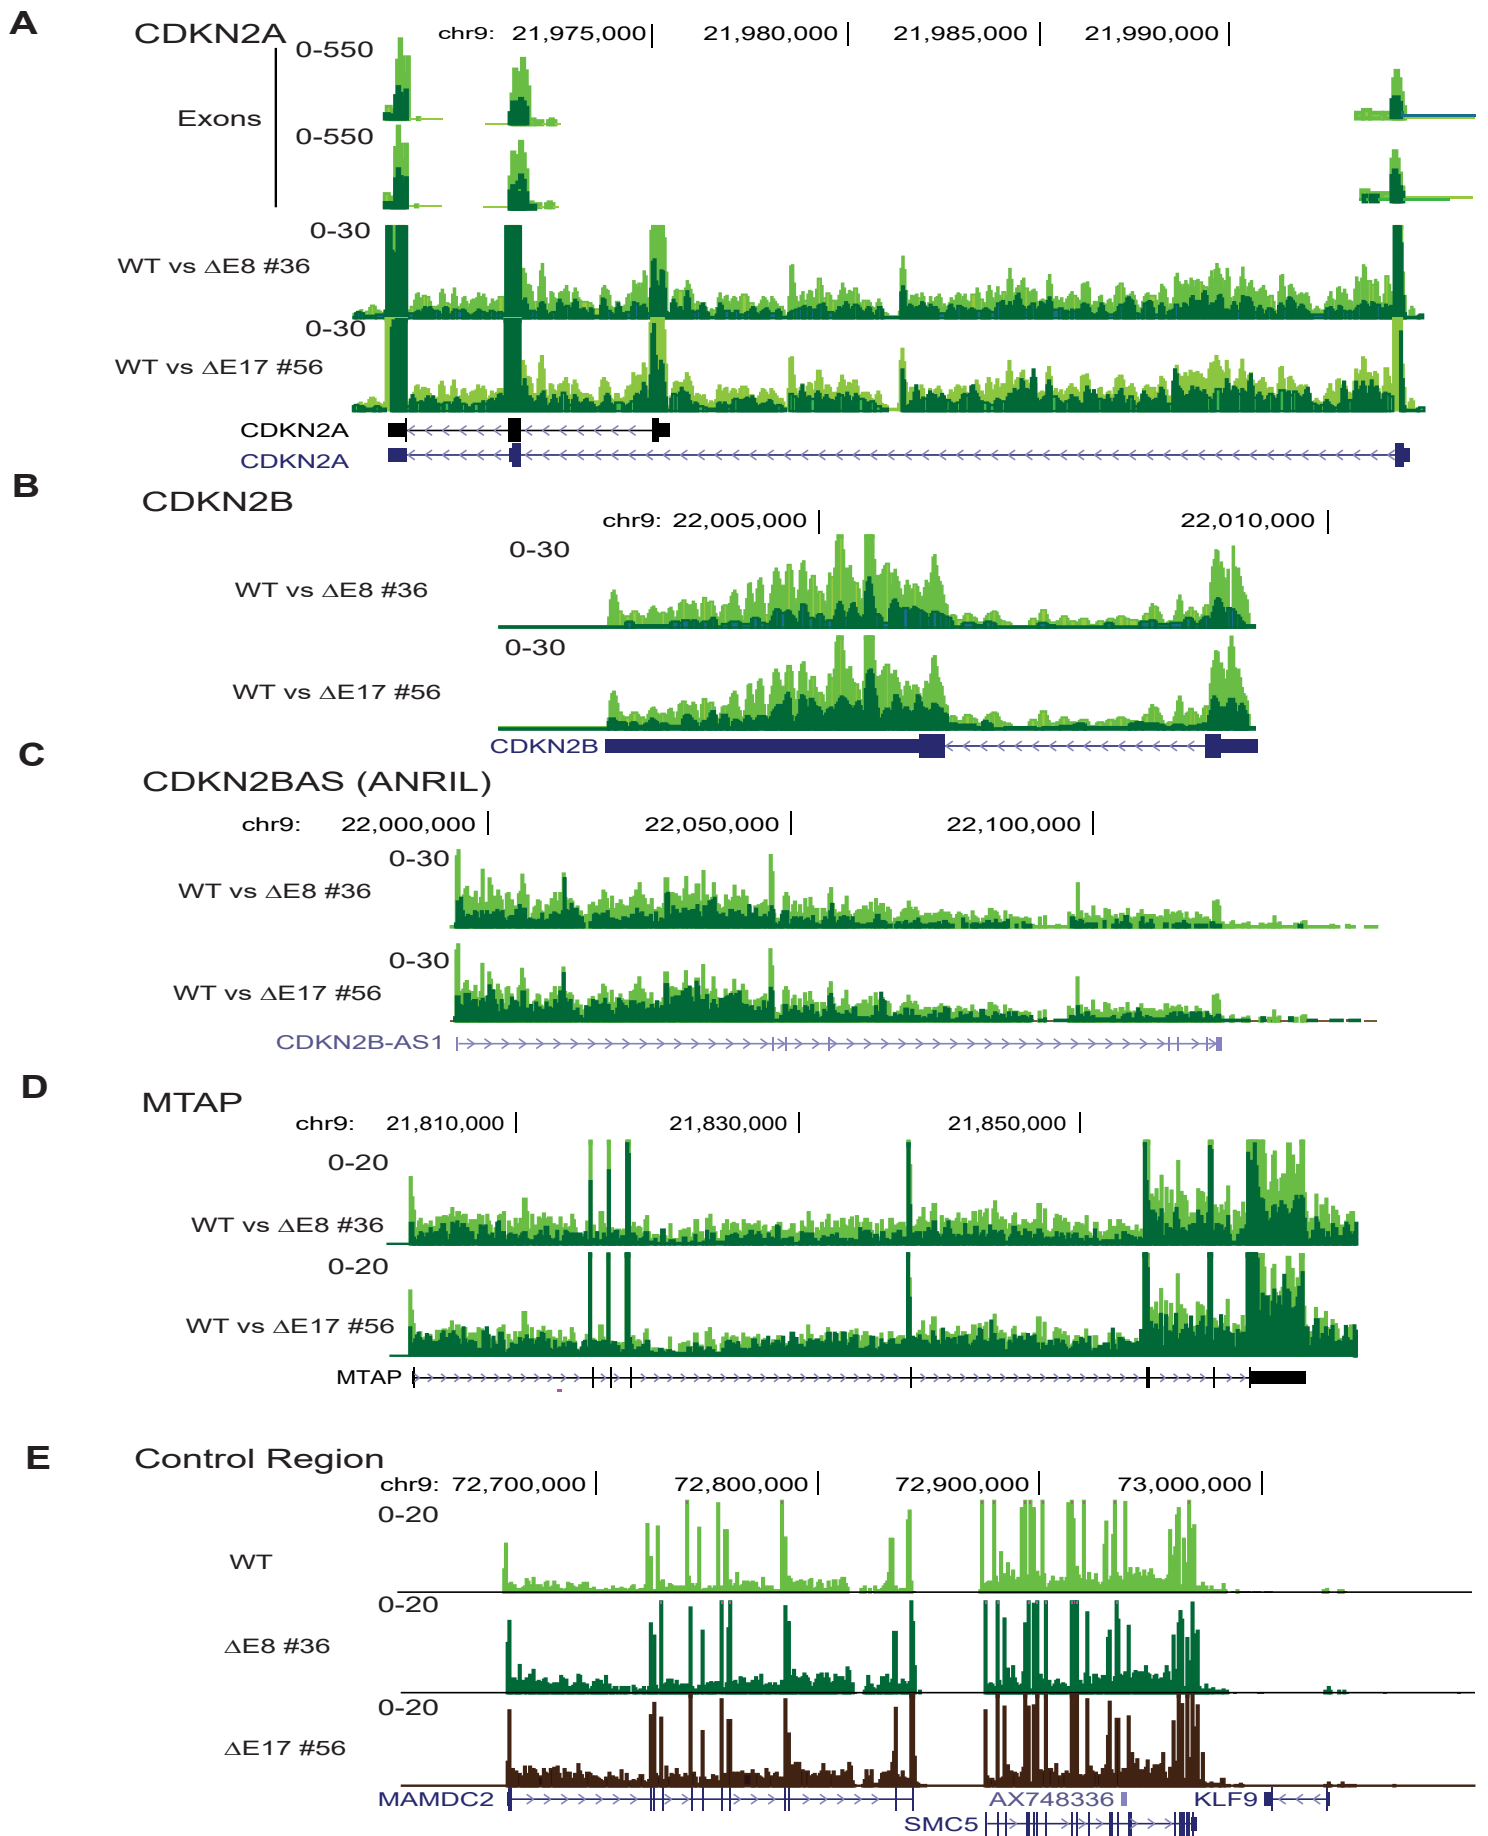

**Supplementary Figure 6 (Related to Figure 7). Expression of INK4a/ARF genes is perturbed upon enhancer deletions:** (A-D) UCSC browser shots of RNA-seq showing (A) signal from exons and entire gene body of CDKN2A, (B) CDKN2B, (C) CDKN2BAS, (D) MTAP expression in E8 and E17 enhancer deletion lines. (E) Control genes outside INK4a/ARF TAD showing no change in expression upon E8 and E17 deletion.

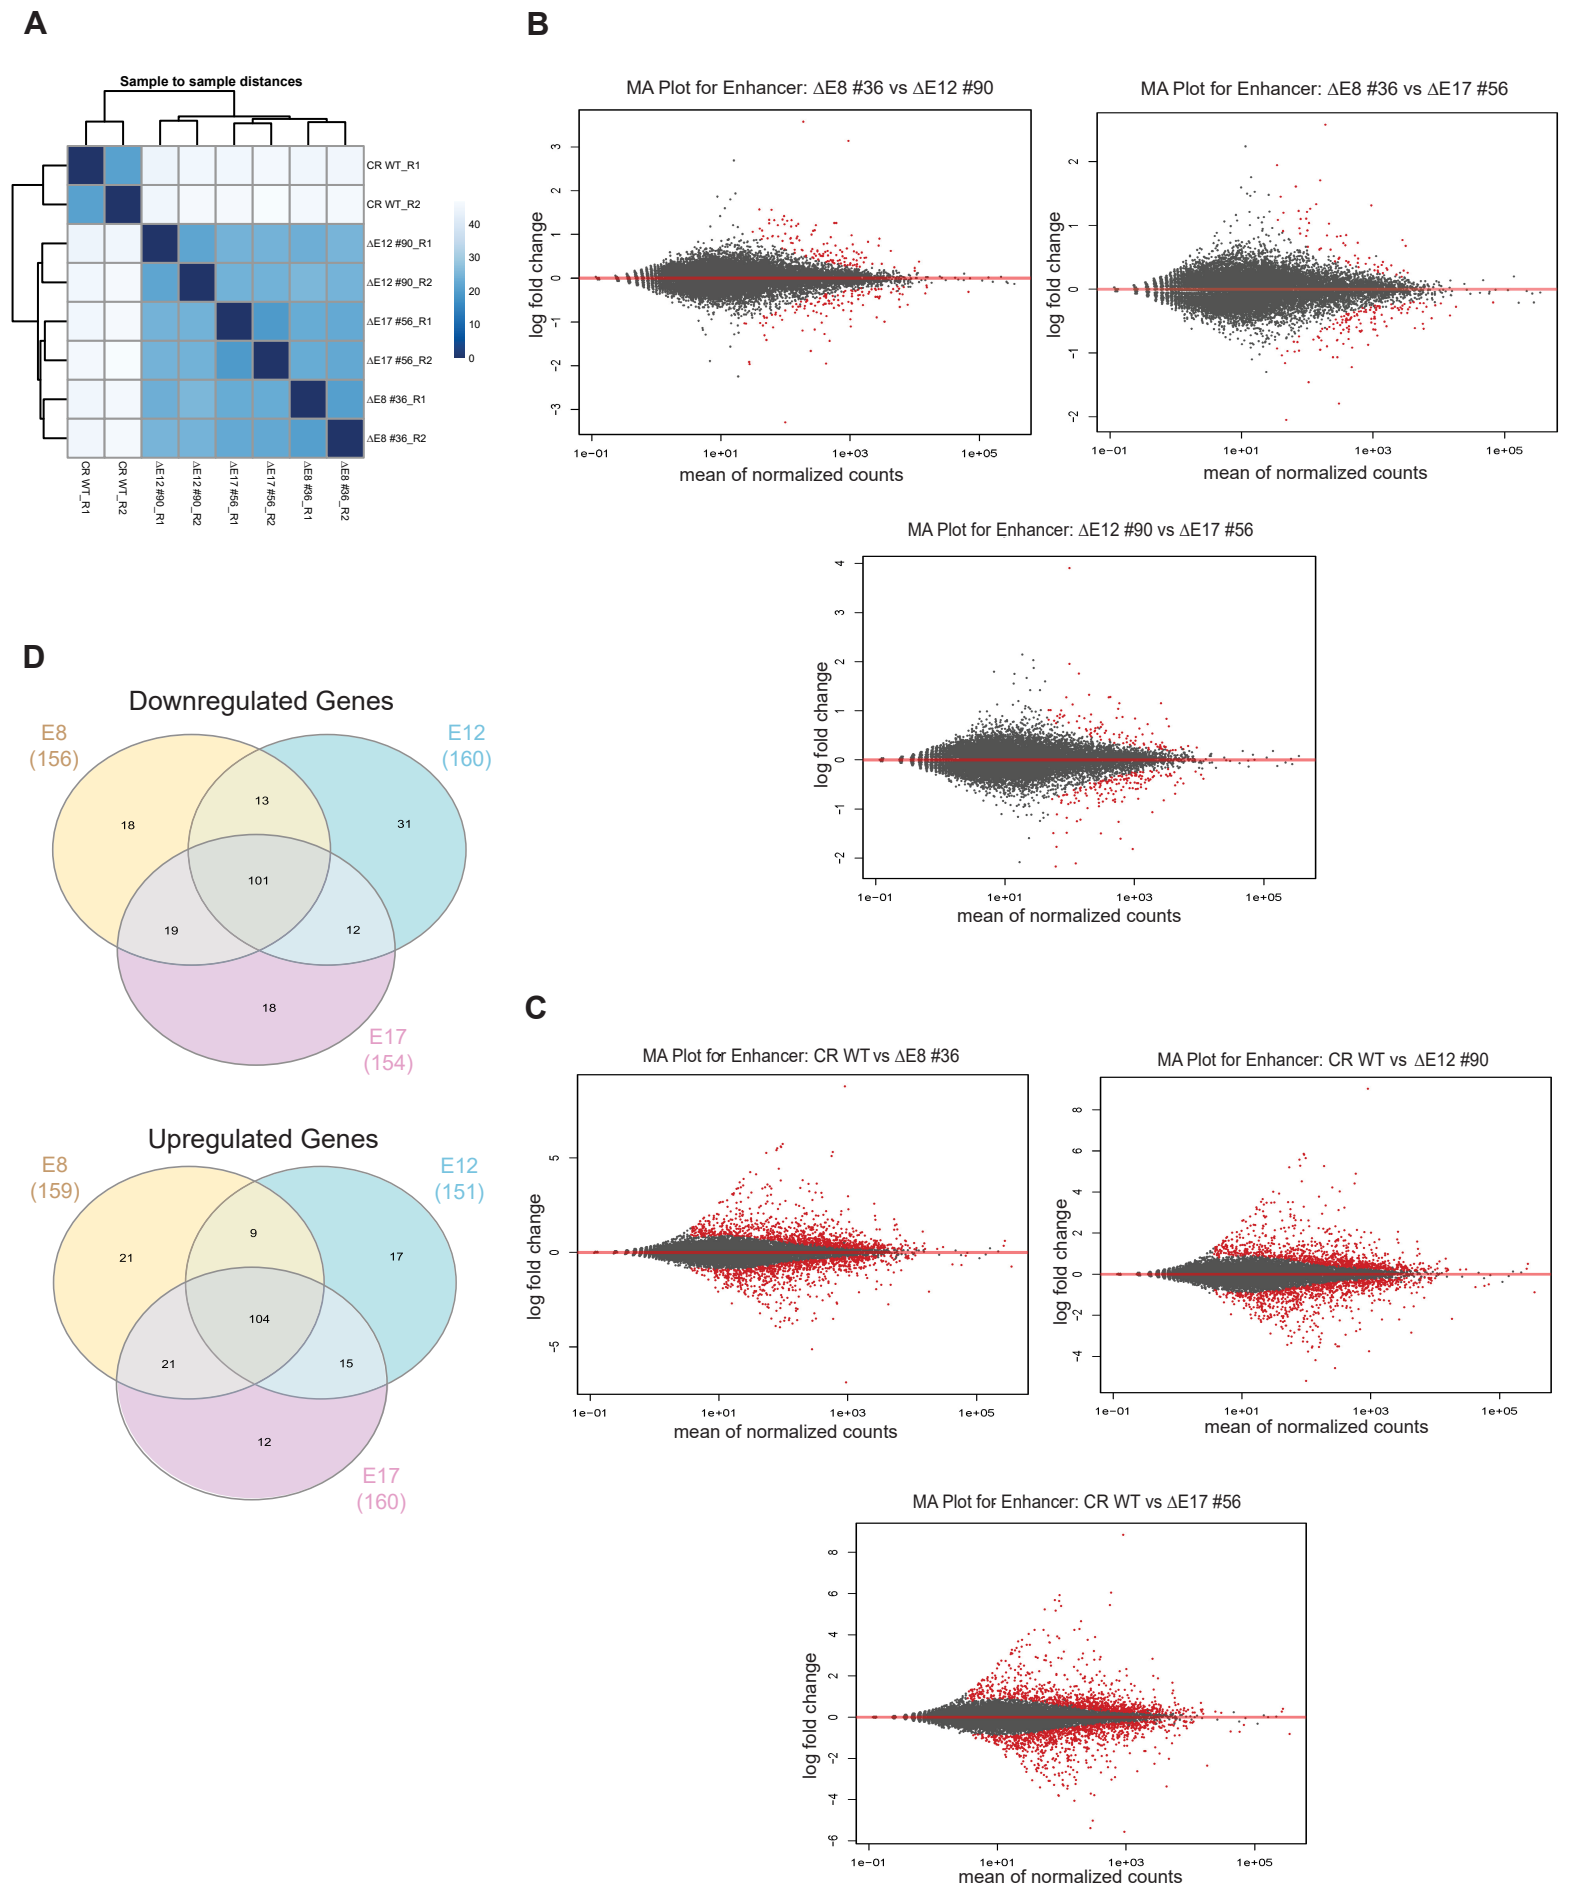

**Supplementary Figure 7 (Related to Figure 7). Alterations in genome-wide transcription is similar upon any enhancer deletion: (A)** Positional matrix positions together the replicates of RNA-seq upon an enhancer deletion or WT cells and (B) MA plots comparing the RNA-seq data from E8 with E12, E8 with E17, E12 with E17. (C) MA plots comparing RNA-seq from WT cells with E8, or E12, or E17 deletions. (D) Venn diagram showing the number of common, unique, down regulated genes (upper diagram) and upregulated genes (lower diagram) upon enhancer deletions.

**Table S1 (Related to Figure 2, 3, 4 and 5): List of oligos used**

**Oligos used for qRT-PCRs:**

| Oligo Name     | Forward Oligo (5' – 3')    | Reverse Oligo (5' – 3')       |
|----------------|----------------------------|-------------------------------|
| p14            | AACATGGTGCGCAGGTTCT        | CACCAGCGTGTCAGGAAG            |
| p15            | CGTTAAGTTTACGGCCAACG       | CCATCATCATGACCTGGATCG         |
| p16            | ATGGAGCCTTCGGCTGACT        | CACCAGCGTGTCAGGAAG            |
| Gapdh          | CGCTCTCTGCTCCTCCTGTT       | CCATGGTGTCTGAGCGATGT          |
| Anril Ex7b     | AGAATTCTTGATTCTTTGCTTTCC   | TCCCTAGTTTTGAGGACTAAGCTACT    |
| Anril Ex7-13   | GAACTCCCGACCTCGTGATTTCG    | CTTCGTAGGAAATTCCTAGCTCCGTAATC |
| Anril Ex10-13b | CTGTGGCCACCTTGGAGA         | TGGCTTCCATAGCACCAACT          |
| Anril Ex18-19  | AATGAGGCTGAGAGCATGGGAGATAC | GAGATATAGGTTCCAGTCCTGGTTCTG   |
| E8 S eRNA      | CAGCCAACCCCTGTATTGT        | TGCTGGCTGAGTTGCAATAAC         |
| E8 AS eRNA     | CAATACAGGGGTTGGCTGT        | TGCTGCCCAATCAGAAGATG          |
| E12 S eRNA     | ATGTCAGGGCCAGAAGTCGT       | AAGGTCACAGCCCTGAAGGA          |
| E12 AS eRNA    | CACCCTGACTTGTCCACAG        | CAGCAAACCACAATCCACA           |
| E17 S eRNA     | GGGTTTACATCCCAAAGCA        | TGAACAGGGAGCAGGAGTGA          |
| E17 AS eRNA    | TGGGGTGA CT CAGACCTTCA     | GACGAGGAGGCGTTGAAAAC          |
| E21 eRNA       | TCACTGTGAGCAGGAAACGT       | CACAGACACTTAGGCACACACAT       |

**Oligos used for ChIP qPCRs:**

| Oligo Name | Forward Oligo (5' – 3')       | Reverse Oligo (5' – 3')         |
|------------|-------------------------------|---------------------------------|
| p14TSS     | ACCCAGGATATTCGGGACTCACTGAC    | CGTCTCTAGCCCAGGCTAGGAGG         |
| p15TSS     | CCGTCGTCCTTCTGCGGCTTG         | AGTGAGGACTCCGCGACGCGT           |
| p16TSS     | TCGCCAGGAGGAGGTCTGTGATTAC     | CAGGTGGGTAGAGGGTCTGCAGC         |
| E8 ChIP    | GCTGAGGCAAGGGGACATACCAAACAC   | GCTCACAAGCTACAGATATGCTGGCTGAG   |
| E12 ChIP   | GGAAGTAGAGGTAGTCCTGGCTACTTGGG | CACCTCACCTATCTTGAAGGCAGGCCACACT |
| E17 ChIP   | GAATGGCAATTGCGGCAACCATG       | GTATCGTCTCCTTCCTCCACAATCC       |
| E21 ChIP   | TGGGTCCTATATAAACCTTCTTC       | CACAGACACTTAGGCACACACAT         |

**Oligos used for Surveyor Assay:**

| Oligo Name | Forward Oligo (5' – 3') | Reverse Oligo (5' – 3')  |
|------------|-------------------------|--------------------------|
| E8         | TACTGTTGGAAGGATCCGTTAGC | CCCAAACCATGTAGAGAGCATC   |
| E12        | GCTATTAGGATGGCCAATGATC  | CTAGCGCAATACCACAGTGAACAT |
| E17        | TGACACTGCCAATCAGTTGTAGG | AGGGGACTAAAGAAGACTCCACA  |
| E21        | CTGCCACGATATTTAGCAATC   | GCTAGATGTTGCTGTGATGCT    |

**Oligos used for 4C:**

|                  |                        |
|------------------|------------------------|
| CDKN2A Viewpoint | TGGGAGGAGCTAGGGCAAGCTT |
| E12 Viewpoint    | AAAGAGGTGAACTAAGCTT    |

**Table S2 (Related to Figure 3): List of gRNAs used**

**gRNAs used for CRISPRi:**

| <b>gRNA Name</b> | <b>gRNA Sequence</b>  |
|------------------|-----------------------|
| E8 gRNA 1        | AGTGTTGCCCTGCTAAGATC  |
| E8 gRNA 2        | CACATATCCCAACTATGACT  |
| E12 gRNA 1       | CGTGGAGTCTAGCCATGTCA  |
| E12 gRNA 2       | GTGAGGTGTTTTATGACCAC  |
| E17 gRNA 1       | TGGAACCTATTCTAGGGCGT  |
| E17 gRNA 2       | GCCCTCACTGCTACAACCTGC |
| E21 gRNA 1       | ATACATCAACAGAAAGAAGA  |
| E21 gRNA 2       | GGACCTCAACTCACACATGC  |

**gRNAs used for enhancer KOs:**

| <b>gRNA Name</b> | <b>gRNA Sequence</b> |
|------------------|----------------------|
| E8 KO gRNA 1     | AACTGATCGTTTCAAAGCCG |
| E8 KO gRNA 2     | ATGGCATTGCCATATCGTGG |
| E12 KO gRNA 1    | CGTAAACAATGACAACGGAA |
| E12 KO gRNA 2    | ATCTTGCTTACCTCTGCGAG |
| E17 KO gRNA 1    | GATGTGGGTTAGCGTTTCAG |
| E17 KO gRNA 2    | TAGTAACAAGGCATCTCATG |
| E21 KO gRNA 1    | CCCAAATCCAAGAGTAGAGC |
| E21 KO gRNA 2    | TGTTACAGCCTCCCACTGAT |

**Table S3 (Related to Figure 2 and Figure 4): 4C reads and experiments**

| <b>Sample Name</b> | <b>Total Reads</b> | <b>Aligned Reads</b> | <b>Alignment Percentage</b> |
|--------------------|--------------------|----------------------|-----------------------------|
| E9_vp_E8_ED_rep1   | 8894272            | 6159675              | 69.25440328                 |
| E9_vp_E8_ED_rep2   | 5321831            | 4228668              | 79.458893                   |
| E9_vp_E8_WT_rep1   | 7534258            | 5463650              | 72.5174264                  |
| E9_vp_E8_WT_rep2   | 7395234            | 4645476              | 62.81716035                 |
| Promoter_HeLa_rep1 | 6796753            | 6176852              | 90.87945376                 |
| Promoter_HeLa_rep2 | 4587697            | 4156286              | 90.59634932                 |
